# Supplementary material
Source: PubMed Central journal article supplement (PMC6378973)
Supplement: supp_RA118.006319_141391_2_supp_251745_pjq005.pdf [file supp_RA118.006319_141391_2_supp_251745_pjq005.pdf]

## Benzene-induced mouse hematotoxicity is regulated by a protein phosphatase 2A complexes that stimulates transcription of *cytochrome P4502E1*

Liping Chen<sup>1,a</sup>, Ping Guo<sup>1,a</sup>, Haiyan Zhang<sup>1</sup>, Wenxue Li<sup>2</sup>, Chen Gao<sup>1</sup>, Zhenlie Huang<sup>3</sup>, Junjing Fan<sup>1</sup>, Yuling Zhang<sup>4</sup>, Xue Li<sup>4</sup>, Xiaoling Liu<sup>1</sup>, Fangping Wang<sup>1</sup>, Shan Wang<sup>1</sup>, Qingye Li<sup>1</sup>, Zhini He<sup>3</sup>, Huiyao Li<sup>1</sup>, Shen Chen<sup>1</sup>, Xiaonen Wu<sup>1</sup>, Lizhu Ye<sup>1</sup>, Qiong Li<sup>1</sup>, Huanwen Tang<sup>5</sup>, Qing Wang<sup>1</sup>, Guanghui Dong<sup>1</sup>, Yongmei Xiao<sup>1</sup>, Wen Chen<sup>1</sup>, Daochuan Li<sup>1,\*</sup>

### Supplementary Table 1

#### Periphery blood cytometry in mice exposed to benzene by inhalation and oral gavage

| Exposure route                   | Exposure level (mean ± SD, ppm or mg/kg) |                           |                          |                           |
|----------------------------------|------------------------------------------|---------------------------|--------------------------|---------------------------|
|                                  | 0                                        | 1                         | 10                       | 100                       |
| <b>Dynamic inhalation (n=10)</b> |                                          |                           |                          |                           |
| HGB (g/L)                        | 92.90±9.97                               | 91.10±14.93               | 93.80±8.53               | 77.40±11.59 <sup>a</sup>  |
| MCH (pg)                         | 12.30±0.52                               | 12.00±0.50                | 12.42±0.45               | 14.05±0.78 <sup>a</sup>   |
| MCHC (g/L)                       | 290.17±10.32                             | 285.68±6.53               | 282.53±5.40 <sup>a</sup> | 301.25±7.80 <sup>a</sup>  |
| RDW-CV (%)                       | 19.92±1.47                               | 19.56±1.64                | 20.83±1.26               | 24.47±0.69 <sup>a</sup>   |
| HCT (%)                          | 49.68±3.11                               | 49.37±6.86                | 50.36±4.40               | 44.80±2.64 <sup>a</sup>   |
| MPV (fl)                         | 3.94±0.21                                | 3.97±0.17                 | 3.83±0.28                | 3.93±0.40                 |
| MID                              | 0.23±0.11                                | 0.17±0.07                 | 0.19±0.08                | 0.07±0.03 <sup>a</sup>    |
| NEU (10 <sup>9</sup> /L)         | 1.84±0.46                                | 1.84±0.35                 | 1.77±0.15                | 0.79±0.19 <sup>a</sup>    |
| LYM %                            | 56.19±3.04                               | 49.85±2.59 <sup>a</sup>   | 45.77±5.46 <sup>a</sup>  | 48.12±6.87 <sup>a</sup>   |
| NEU %                            | 38.82±4.08                               | 45.79±3.22 <sup>a</sup>   | 49.01±6.08 <sup>a</sup>  | 47.60±7.14 <sup>a</sup>   |
| MID%                             | 5.00±2.41                                | 4.36±1.94                 | 5.22±1.60 <sup>a</sup>   | 4.28±1.17 <sup>a</sup>    |
| <b>Oral gavage (n=6)</b>         |                                          |                           |                          |                           |
| HGB (g/L)                        | 132.83±4.62                              | 129.58±10.63              | 126.75±10.63             | 115.00±7.04 <sup>a</sup>  |
| MCH (pg)                         | 15.96±0.14                               | 16.09±0.31                | 16.33±0.37               | 17.47±0.44 <sup>a</sup>   |
| MCHC (g/L)                       | 279.50±7.07                              | 306.70±18.29 <sup>a</sup> | 283.30±5.71              | 301.30±15.06 <sup>a</sup> |
| RDW-CV (%)                       | 18.55±0.44                               | 19.02±0.58                | 19.41±1.63               | 22.01±1.71 <sup>a</sup>   |
| HCT (%)                          | 47.50±1.88                               | 42.43±4.10                | 44.07±1.82               | 38.24±4.29 <sup>a</sup>   |
| MPV (fl)                         | 4.60±0.13                                | 4.62±0.12                 | 4.60±0.09                | 4.48±0.11 <sup>a</sup>    |
| MID                              | 0.22±0.06                                | 0.17±0.05 <sup>a</sup>    | 0.17±0.05 <sup>a</sup>   | 0.07±0.01 <sup>a</sup>    |
| NEU (10 <sup>9</sup> /L)         | 2.04±0.48                                | 2.18±0.50                 | 1.61±0.35                | 0.89±0.09 <sup>a</sup>    |
| LYM %                            | 53.17±6.11                               | 41.98±5.33                | 47.75±11.00              | 43.55±5.08 <sup>a</sup>   |
| NEU %                            | 42.24±5.64                               | 54.00±5.32                | 47.56±10.81              | 52.18±4.73 <sup>a</sup>   |
| MID%                             | 4.59±0.87                                | 4.02±0.55                 | 4.69±0.61                | 4.28±0.56                 |

<sup>a</sup>  $P < 0.05$ , compared with the corresponding control group, as determined by Independent-sample  $t$ -test or assessed with One-way ANOVA followed by Bonferroni post-test.

**Supplementary Table 2**

## Primers for RT-qPCR analysis

| Gene           | Forward Primer                  | Reverse Primer            |
|----------------|---------------------------------|---------------------------|
| cyp1a2         | GAGGTATCCTGACCCTGAAGTA          | CACACGCAGCTCATTGTAGA      |
| cyp2e1         | GTCTTCCTCTTCTTAGCCATCC          | GCTTCATGGTCAACCCATAGT     |
| cyp2a22        | GGCACTGATGTGTTCCCTATAA          | CCTGACCAAATGGCTGTAGAT     |
| cyp2a4         | CTTCATCGACTCCTTCCTCATC          | GTGCCAGCAAAGAAGAGATTTAG   |
| cyp2a5         | GAGGAGATTGATCGGGTGATTG          | CATGGATTACAGCCTCCGTATAG   |
| cyp3a11        | TGAATATGAAACTTGCTCTCACTAA<br>AA | CCTTGTCTGCTTAATTTTCAGAGGT |
| cyp2c29        | CACAGCTAAAGTCCAGGAAGAG          | GAATCATGGCGTCTGTATAGGG    |
| cyp2c37        | CTGCCAATCCTTCACCAATTTATC        | CTTCCTTCACTGCCTCATATCC    |
| cyp2d22        | TTGAACTACAGGGCTTCCTTATC         | TCTCCCAGACAGTCTCATCTT     |
| cyp2d9         | CAGAAGTCCTTCATCGCCATAC          | CCAGGAAGGCATCAGTCAAA      |
| cyp2f2         | TGCTCACCATCATCCACTTTAT          | CACCACACGGTCAATCTCTT      |
| gstp1          | GAGACCTCACCTTTACCAATC           | CCCATCATTCACCATATCCATCT   |
| Gsta1          | GCTTCTCTAGCTCACGCTATTC          | CCCAGTCAAGGCTCTACTTATTG   |
| Gstm1          | GACTTTCCCAATCTGCCTTACT          | CTCCTCCTCTGTCTCTCCATC     |
| Gstm2          | GAGACAGAGGAGGAGAGGATT           | GGGAAGAGGAAATGGAGGAATAG   |
| Gstm3          | GTTATGGACACCCGCATACA            | CCCCTGGGCTATCTTAGTAAAC    |
| Gstm4          | GCTTCTCTAGCTCACGCTATTC          | CCCAGTCAAGGCTCTACTTATTG   |
| $\beta$ -actin | GAGGTATCCTGACCCTGAAGTA          | CACACGCAGCTCATTGTAGA      |

**Supplementary table 3**The values of  $m/z$  and mass error of benzene and its metabolites

| Chemical     | $m/z$ of<br>Target ion | mice | $\Delta m/z$ (mmu) |        |        |        |        |
|--------------|------------------------|------|--------------------|--------|--------|--------|--------|
|              |                        |      | M1                 | M2     | M3     | M4     | M5     |
| Benzene      | 79.0542<br>(+)         | WT   | 0.733              | 0.533  | 0.533  | 0.473  | 0.49   |
|              |                        | HO   | 0.223              | 0.463  | 0.443  | 0.743  | 0.433  |
| Phenol       | 93.0346<br>(-)         | WT   | -0.271             | -0.261 | -0.311 | -0.341 | -0.371 |
|              |                        | HO   | -0.321             | -0.261 | -0.291 | -0.241 | -0.231 |
| Hydroquinone | 109.0295<br>(-)        | WT   | -0.076             | -0.236 | -0.276 | -0.282 | -0.346 |
|              |                        | HO   | -0.266             | -0.216 | -0.346 | -0.046 | -0.196 |
| tt-MA        | 141.0193<br>(-)        | WT   | -0.095             | -0.105 | -0.155 | -0.175 | -0.245 |
|              |                        | HO   | -0.225             | -0.235 | -0.085 | -0.045 | -0.005 |

“+” and “-” were indicated as positive ions and negative ions, respectively.

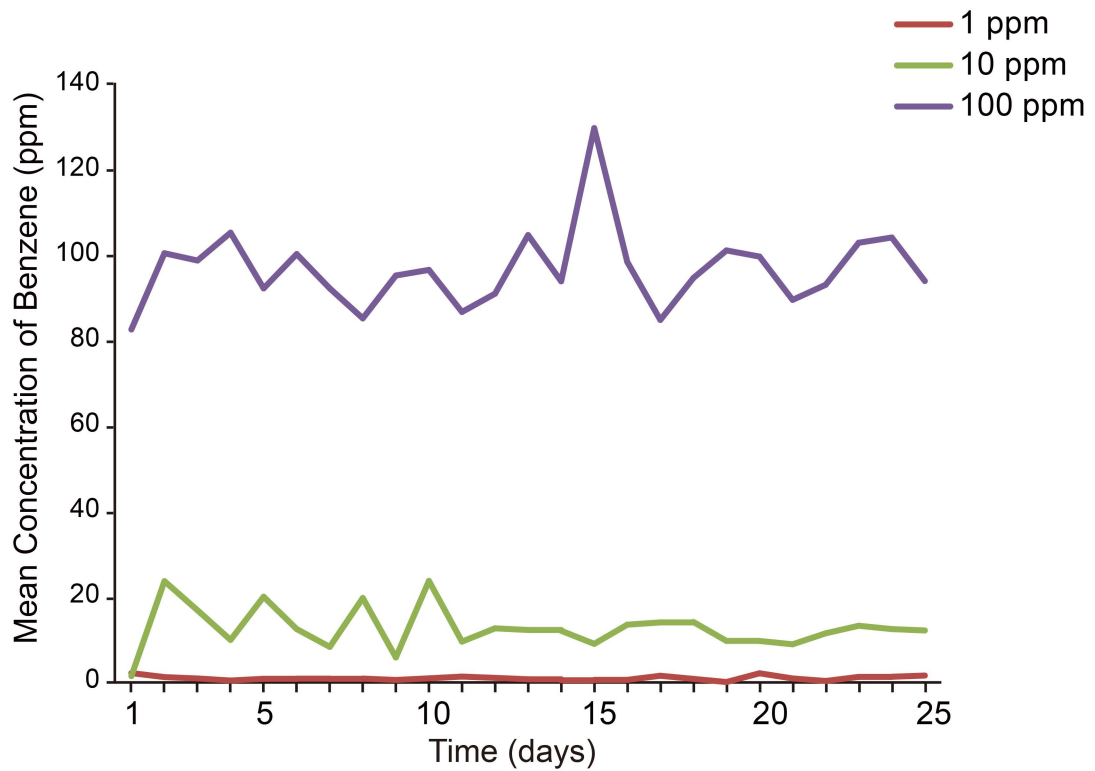

Figure S1 The benzene concentrations in inhalation chambers

The daily mean concentrations of benzene vapor in the inhalation chambers were monitored by gas chromatography-mass spectrometry (GC-MS) every day during the inhalation exposure period.

A

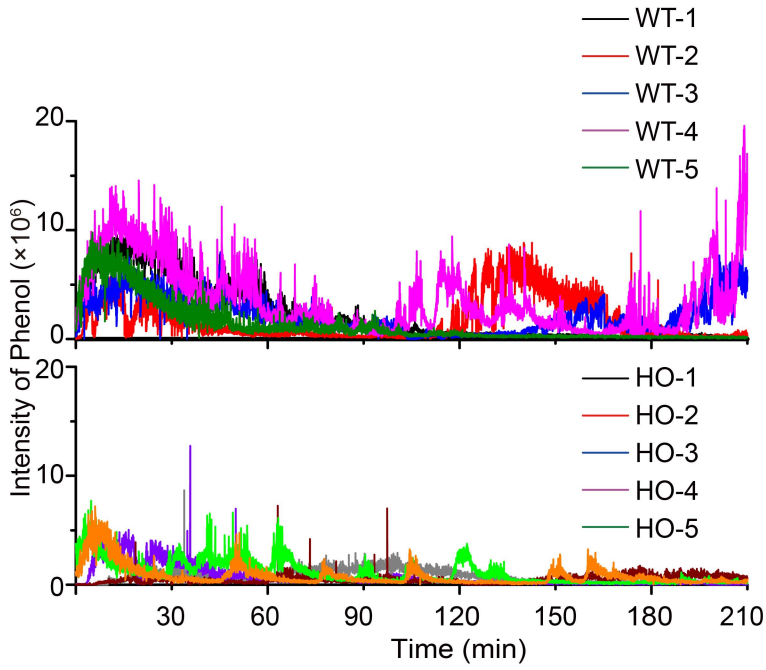

B

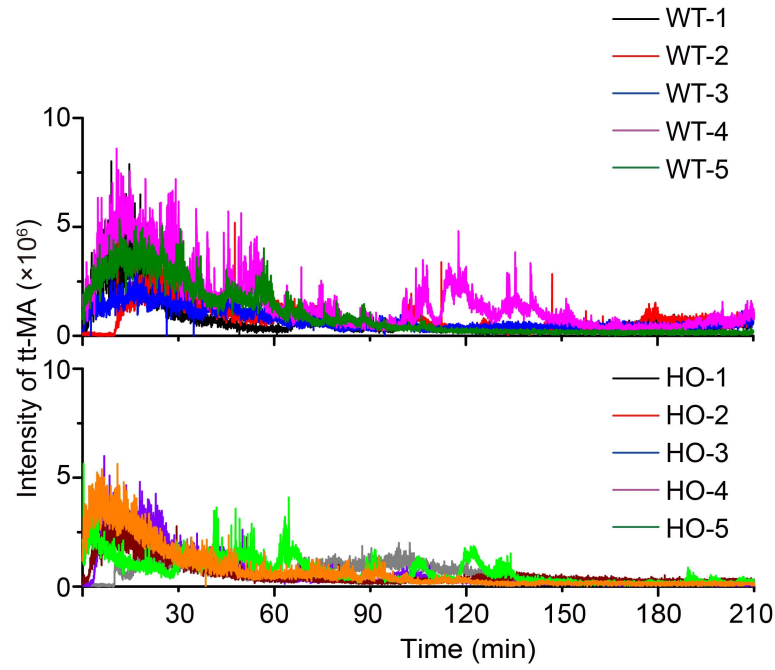

C

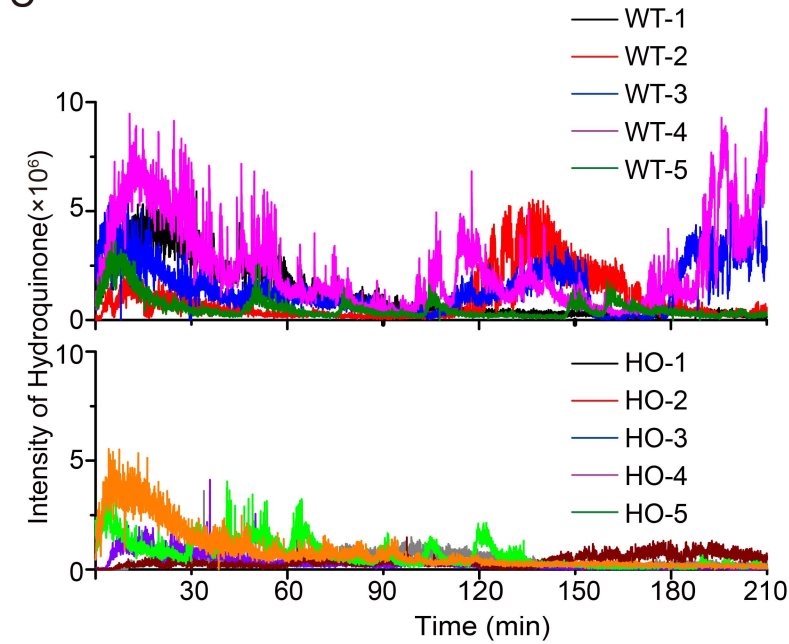

D

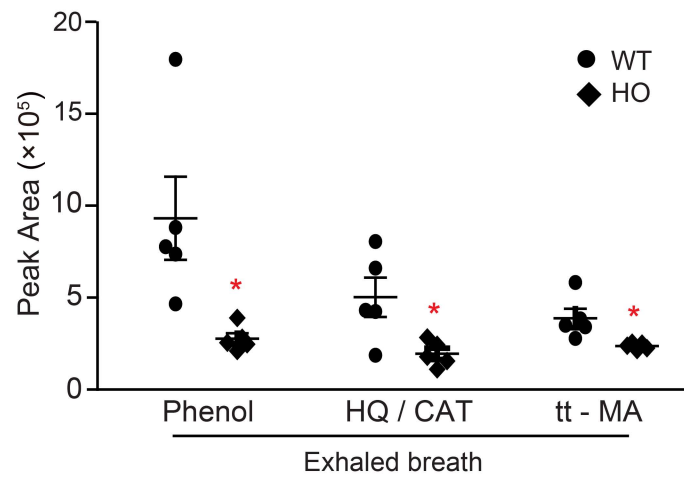

Figure S2 The effect of PP2A A $\alpha$  deletion on the contents of exhaled benzene metabolites

WT and HO mice (n=5) were administrated with benzene at dose of 100 mg/kg and the components were monitored dynamically over 210 min in total. The contents of exhaled metabolites including (a) phenol, (b) tt-MA, and (c) hydroquinone was determined by a real time MI-SPI-TOFMS. Representative images showed two-dimensional mass spectrum data with standardized m/z intensity and elution time. (d) The contents of exhaled benzene metabolites were determined based on the peak area,  $P < 0.05$  (\*) compared to WT mice, as analyzed by the Student t-test.

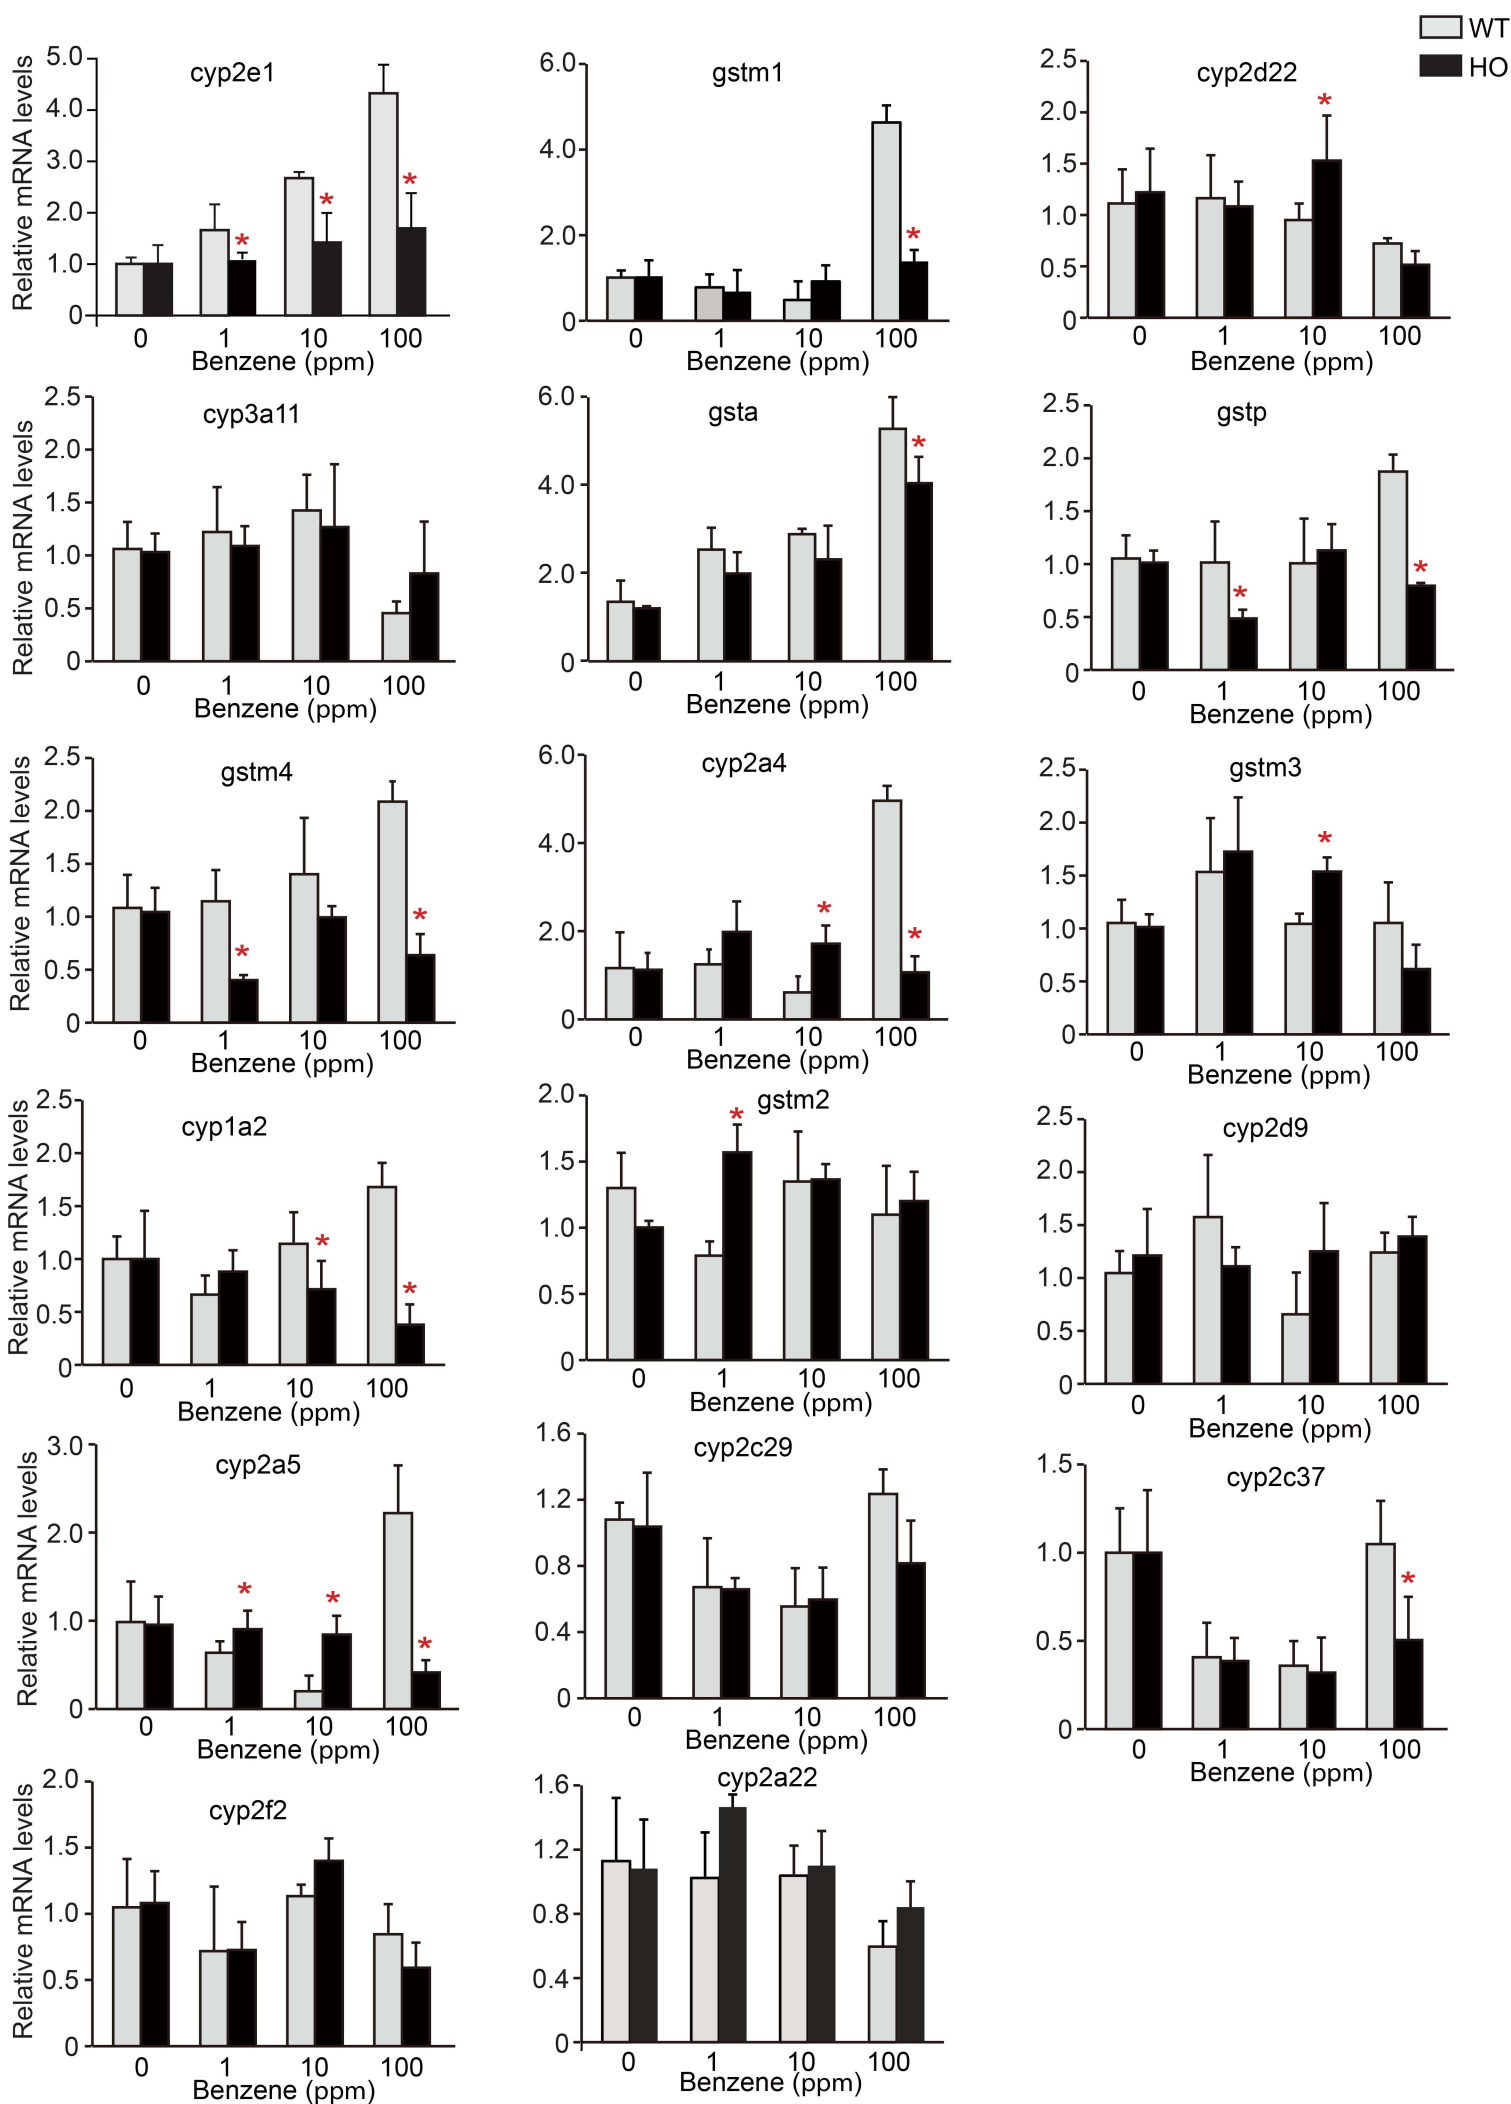

Figure S3 The effect of PP2A  $\alpha$  deletion on the expressions of metabolic enzymes in benzene-treated mice. The relative mRNA levels of 17 metabolic enzymes were examined in WT and HO mice (n=3) exposed to benzene at indicated doses. The data were shown as mean  $\pm$  SEM for three independent experiments. \*P<0.05, compared with the respective control group, as analyzed by the Student t-test.

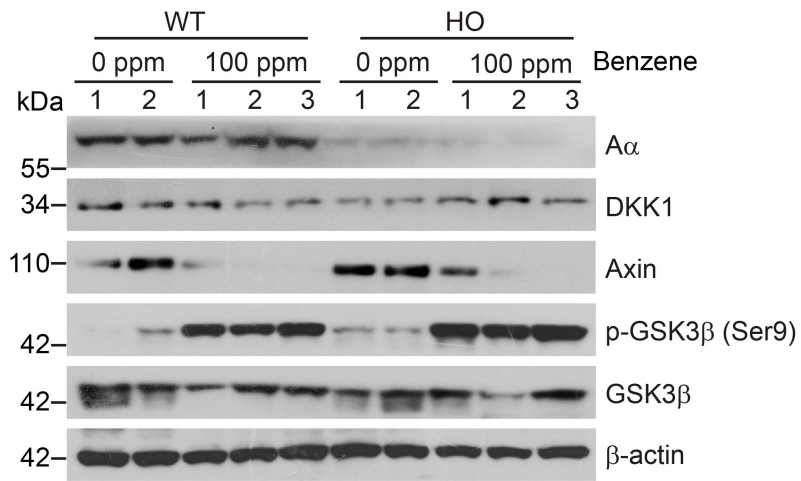

Figure S4 The expressions of Wnt/ $\beta$ -catenin components in benzene-treated mice  
 Immunoblotting analysis of A $\alpha$ , DDK1, Axin, GSK3 $\beta$ , and phosphorylated GSK3 $\beta$  in WT and HO mice liver treated with 100 ppm benzene.

**A** Bone marrow cells

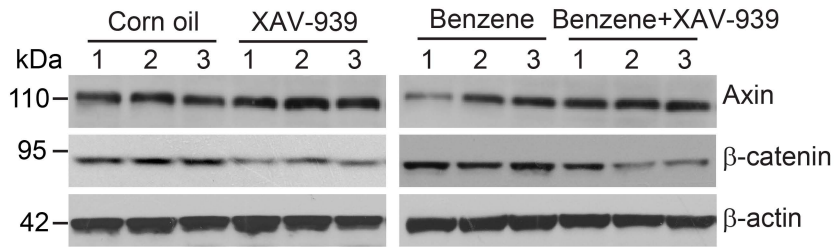

**B**

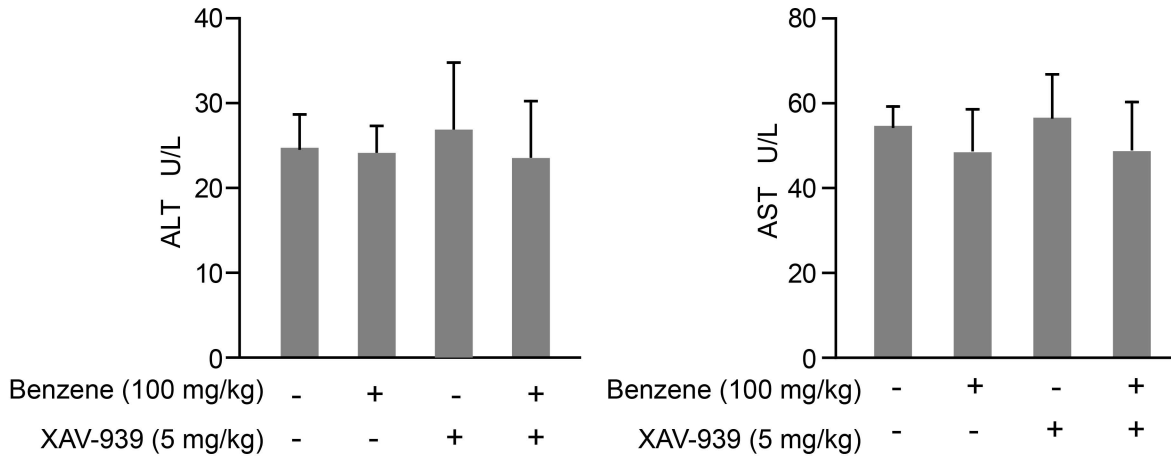

**C**

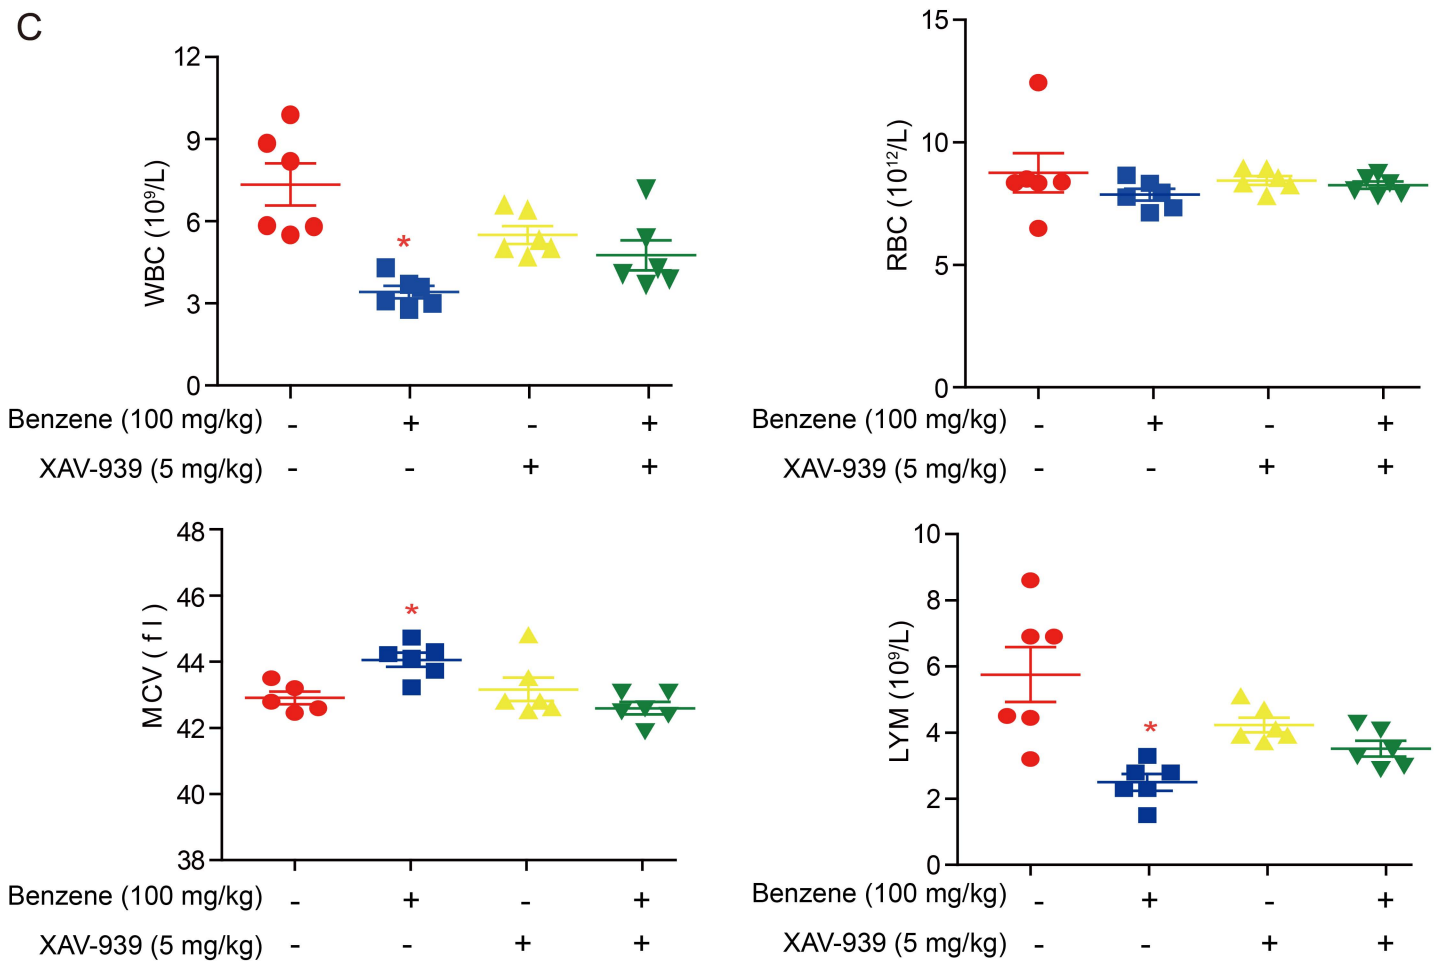

Figure S5 The effect of  $\beta$ -catenin suppression on the hematotoxicity induced by benzene

WT mice ( $n=6$ ) were administrated with benzene at dose of 100 mg/kg and/or 5 mg/kg XAV-939 for 7 days.

(A) Immunoblotting analysis of Axin and  $\beta$ -catenin in bone marrow cells at indicated treatment group. (B) The ALT and AST levels of plasma at indicated group mice. (C) Peripheral blood counts including WBC, RBC, MCV, and LYM. Data were shown as mean  $\pm$  SD. \* $P<0.05$ , compared with the control mice.



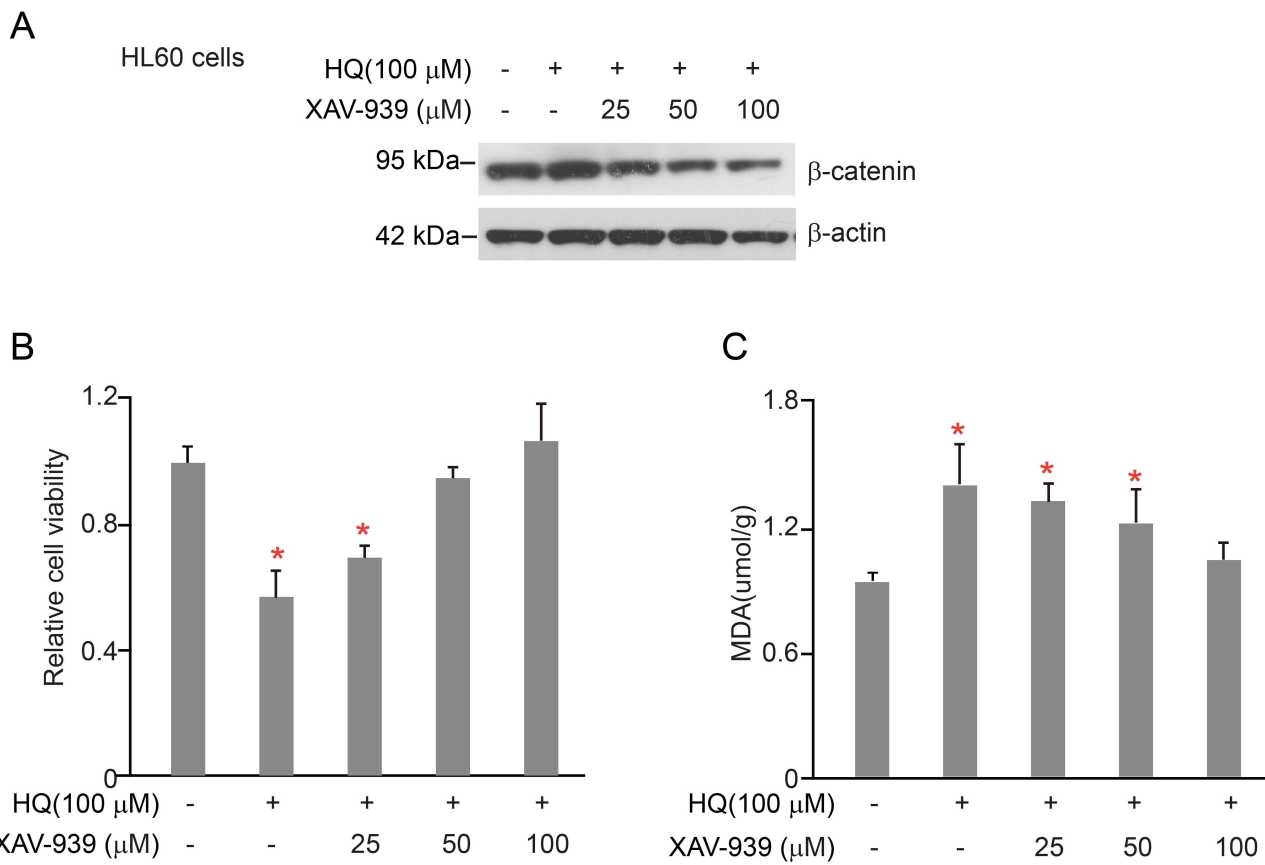

Figure S6 The effect of  $\beta$ -catenin suppression on the toxicity induced by HQ  
 HL60 cells were treated with 100  $\mu$ M HQ and/or XAV-939 at the indicated concentrations for 24 h, respectively.  
 (A) Immunoblotting analysis of  $\beta$ -catenin in HL60 cells at the indicated treatment. (B) Relative cell viability was measured by MTT assay. (C) MDA content was determined and calculated as  $\mu$ mol/g protein. Data were shown as mean $\pm$ SD from three independent experiments. \* $P$ <0.05, compared with the control cells.

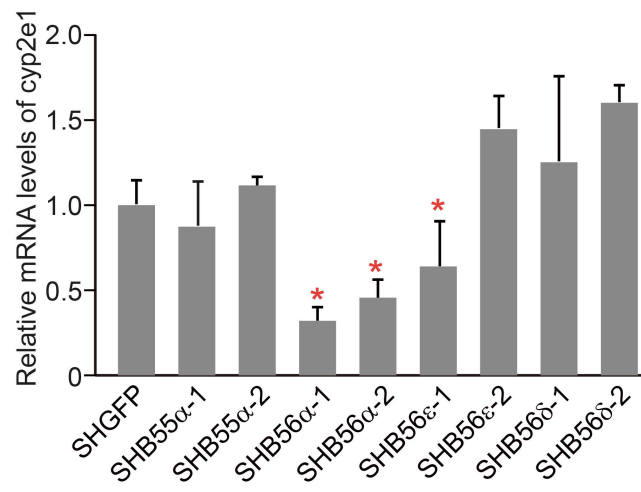

Figure S7 The effects of suppression of PP2A B subunits on the expressions of cyp2e1  
The relative mRNA level of cyp2e1 was examined in HepG2 cells expressing shRNA targeting B55 $\alpha$ , B56 $\alpha$ , B56 $\delta$ , or B56 $\epsilon$  subunit. Data were shown as mean  $\pm$  SEM for three independent experiments. \* $P$ <0.05, compared with the respective control group.

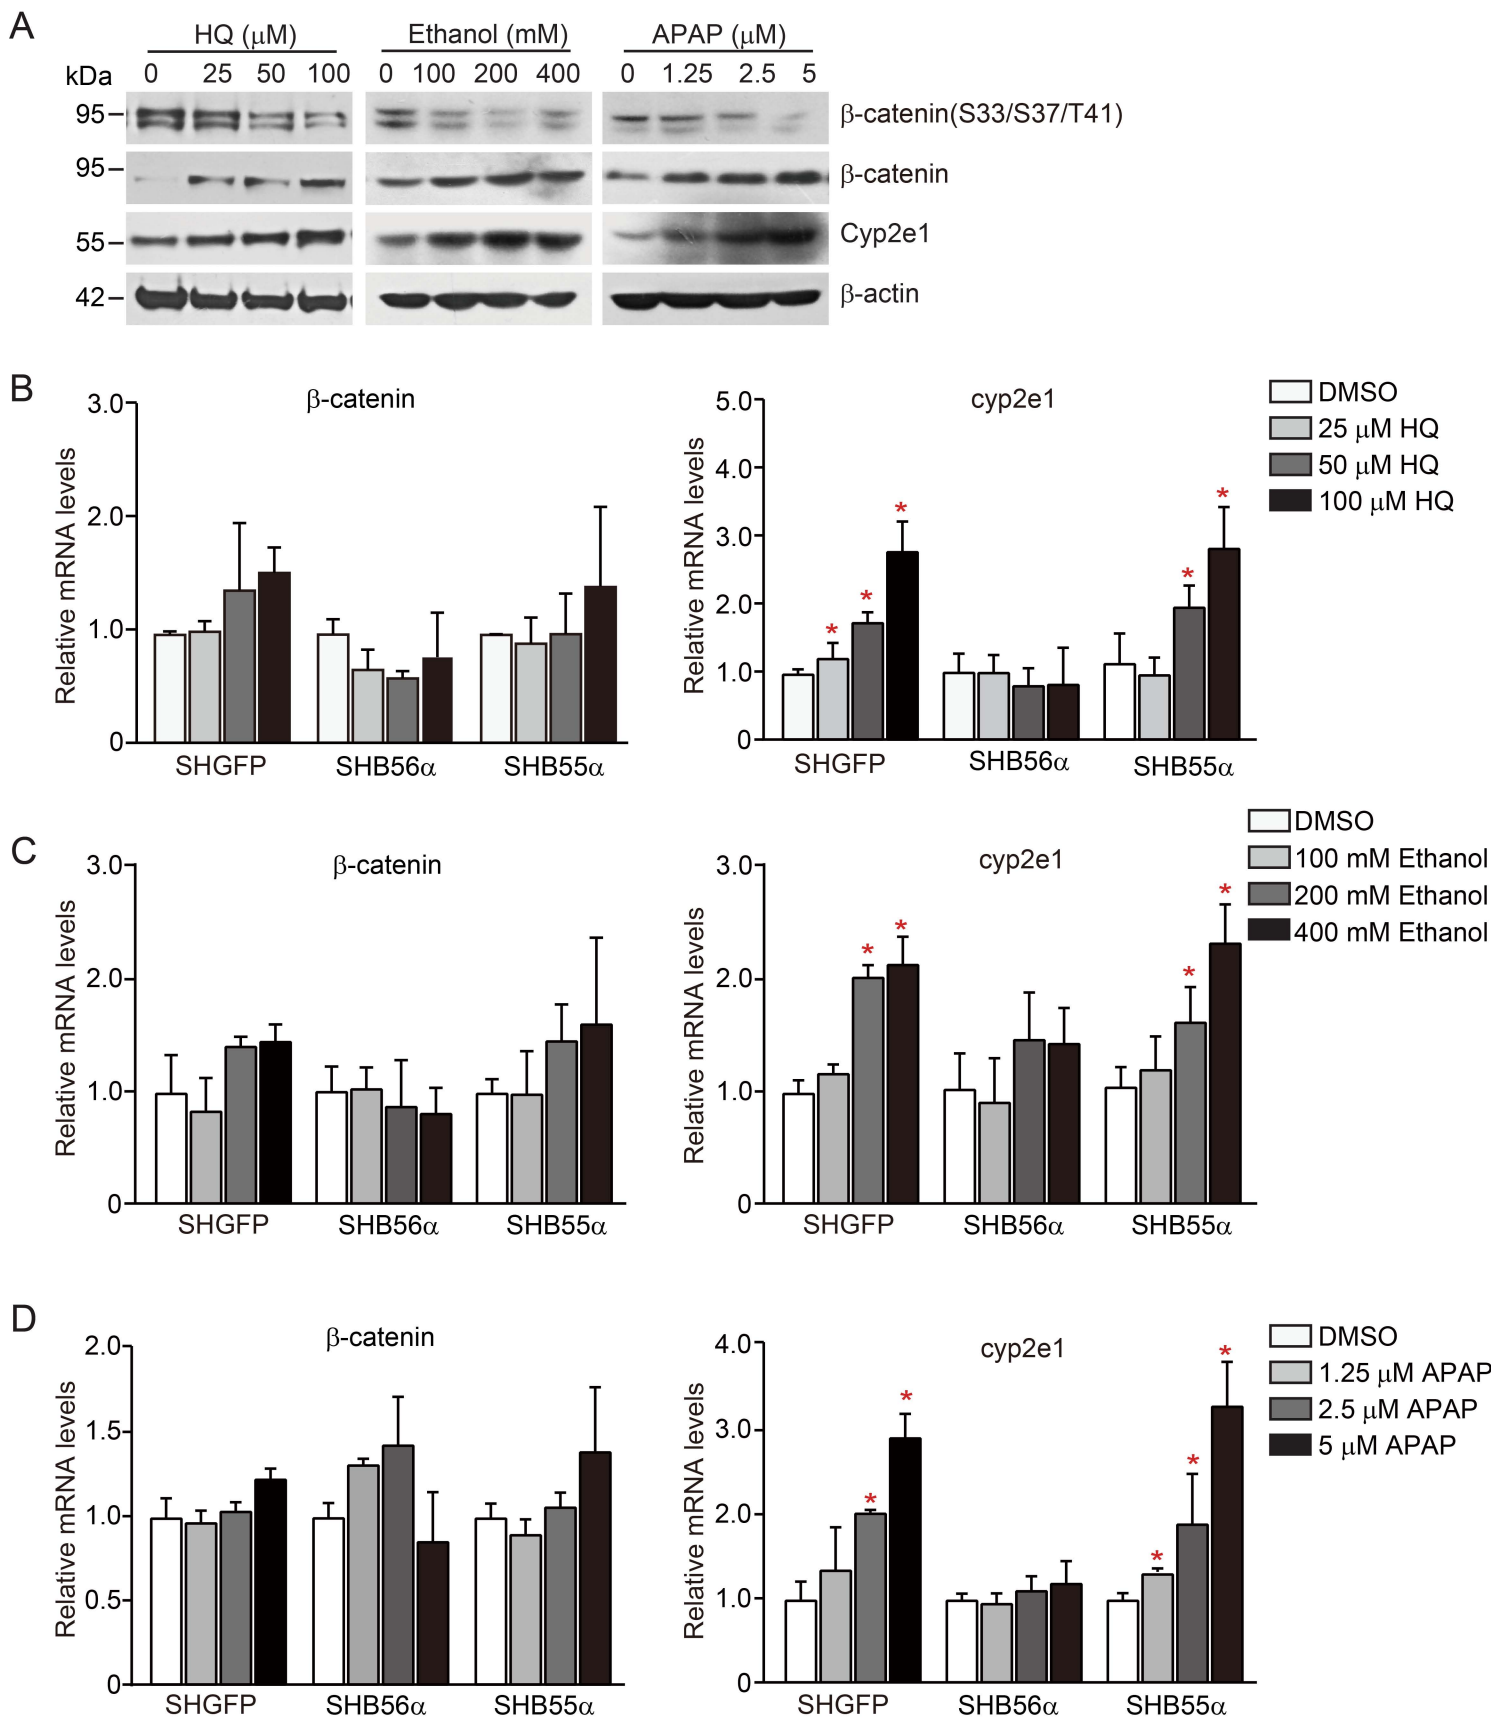

Figure S8 The induction of Cyp2e1 and  $\beta$ -catenin expression upon agonists

(A) HepG2 cells were treated with ethanol, HQ, or APAP at the indicated concentrations for 24 h, respectively, and followed by immunoblotting analysis with an antibody against  $\beta$ -catenin,  $\beta$ -catenin (S33/S37/T41), and Cyp2e1. HepG2-SHGFP, HepG2-SHB56 $\alpha$  and HepG2-SHB55 $\alpha$  cells were treated with (B) HQ, (C) Ethanol, and (D) APAP at the indicated concentrations for 24 h, respectively. The relative mRNA levels of  $\beta$ -catenin and cyp2e1 were examined by Q-PCR. The data were shown as mean  $\pm$  SEM for three independent experiments. \* $P < 0.05$ , compared with the respective control group.
